# Supplementary material for: Long-Term Trends in Freshwater and Marine Growth Patterns in Three Sub-Arctic Atlantic Salmon Populations
Source: MDPI journal article supplement (doi:10.3390/fishes8090441), 2023-08-30
Supplement: s1 [file s1]

**Table S1.** Model selection procedure for FGW and SG models presenting AIC, LogLikelihood and Deviance values. The selected models are presented in bold. FWG = Freshwater growth, RG = River growth, SG = Sea growth, SST = Sea surface temperature. Rainfall and air temperatures were standardized N (0, 1). Log-transformation was used for capelin biomass (BM) and rolling averages over two years of capelin biomass (BM2y) and immature capelin biomass (Imm2y). The final models are in bold.

| Model               | Formula                                                                                                                                                                                                                        | npar      | AIC            | logLik        | deviance       |
|---------------------|--------------------------------------------------------------------------------------------------------------------------------------------------------------------------------------------------------------------------------|-----------|----------------|---------------|----------------|
| FWG models          | FWG ~ 1 + river_age + RG + (1   Smolt_year) + (1   Birth_year) + (1   RG_year)                                                                                                                                                 | 10        | -114816        | 57418         | -114836        |
|                     | FWG ~ 1 + river_age + RG + Population + Age_group + (1   Smolt_year) + (1   Birth_year) + (1   RG_year)                                                                                                                        | 13        | -117532        | 58779         | -117558        |
|                     | FWG ~ 1 + river_age:RG + Population + Age_group + (1   Smolt_year) + (1   Birth_year) + (1   RG_year)                                                                                                                          | 13        | -118118        | 59072         | -118144        |
|                     | FWG ~ 1 + river_age:RG + Population + Age_group + scale(Rainfall_May) + scale(Rainfall_June) + scale(Rainfall_July) + scale(Rainfall_August) + scale(Rainfall_September) + (1   Smolt_year) + (1   Birth_year) + (1   RG_year) | 18        | -118110        | 59073         | -118146        |
|                     | FWG ~ 1 + river_age:RG + Population + Age_group + scale(T_May) + scale(T_June) + scale(T_July) + scale(T_August) + scale(T_September) + (1   Smolt_year) + (1   Birth_year) + (1   RG_year)                                    | 18        | -118128        | 59082         | -118164        |
|                     | <b>FWG ~ 1 + river_age:RG + Population + Sea_age + Smolt_age + scale(T_May) + scale(T_June) + scale(T_July) + scale(T_August) + scale(T_September) + (1   Smolt_year) + (1   Birth_year) + (1   RG_year)</b>                   | <b>20</b> | <b>-118934</b> | <b>59487</b>  | <b>-118974</b> |
| 1SW fish, SG models | G1 ~ 1 + FWG * Smolt_age + Population + (1   Smolt_year) + (1   Birth_year)                                                                                                                                                    | 11        | 36654          | -18316        | 36632          |
|                     | G1 ~ 1 + FWG * Smolt_age + Population + log(Capelin_BM) + (1   Smolt_year) + (1   Birth_year)                                                                                                                                  | 12        | 36656          | -18316        | 36632          |
|                     | <b>G1 ~ 1 + FWG * Smolt_age + Population + SST_BarentsSeaE + (1   Smolt_year) + (1   Birth_year)</b>                                                                                                                           | <b>12</b> | <b>36637</b>   | <b>-18306</b> | <b>36613</b>   |
|                     | G1 ~ 1 + FWG * Smolt_age + Population + log(Capelin_BM) + SST_BarentsSeaE + (1   Smolt_year) + (1   Birth_year)                                                                                                                | 13        | 36639          | -18306        | 36613          |
|                     | G1 ~ 1 + FWG * Smolt_age + Population + log(Capelin_ImmBM) + SST_BarentsSeaE + (1   Smolt_year) + (1   Birth_year)                                                                                                             | 13        | 36639          | -18306        | 36613          |
|                     | <b>G1 ~ 1 + FWG * Smolt_age + Population + SST_BarentsSeaE + (1   Smolt_year) + (1   Birth_year)</b>                                                                                                                           | <b>12</b> | <b>36637</b>   | <b>-18306</b> | <b>36613</b>   |
| 2SW fish, SG models | TotSG ~ 1 + FWG * Smolt_age + Population + (1   Smolt_year) + (1   Birth_year)                                                                                                                                                 | 11        | 1516.5         | -747.26       | 1494.5         |
|                     | TotSG ~ 1 + FWG * Smolt_age + Population + (1   Smolt_year) + (1   Birth_year)                                                                                                                                                 | 11        | 1516.5         | -747.26       | 1494.5         |
|                     | TotSG ~ 1 + FWG * Smolt_age + Population + Sea_age * SG + (1   Smolt_year) + (1   Birth_year)                                                                                                                                  | 14        | -1250.2        | 639.12        | -1278.2        |
|                     | TotSG ~ 1 + FWG * Smolt_age + Population + Sea_age * SG + SST_BarentsSeaE + (1   Smolt_year) + (1   Birth_year)                                                                                                                | 15        | -1249.2        | 639.59        | -1279.2        |
|                     | TotSG ~ 1 + FWG * Smolt_age + Population + Sea_age * SG + log(BM2y) + (1   Smolt_year) + (1   Birth_year)                                                                                                                      | 15        | -1249.5        | 639.76        | -1279.5        |
|                     | TotSG ~ 1 + FWG * Smolt_age + Population + Sea_age * SG + SST_BarentsSeaE + log(BM2y) + (1   Smolt_year) + (1   Birth_year)                                                                                                    | 16        | -1248.7        | 640.33        | -1280.7        |
|                     | TotSG ~ 1 + FWG * Smolt_age + Population + Sea_age * SG + SST_BarentsSeaE + SST_BarentsSeaW + (1   Smolt_year) + (1   Birth_year)                                                                                              | 16        | -1234.8        | 633.42        | -1266.8        |
|                     | <b>TotSG ~ 1 + FWG * Smolt_age + Population + Sea_age * SG + SST_BarentsSeaE + SST_BarentsSeaW + log(BM2y) + (1   Smolt_year) + (1   Birth_year)</b>                                                                           | <b>17</b> | <b>-1233.4</b> | <b>633.71</b> | <b>-1267.4</b> |
|                     | TotSG ~ 1 + FWG * Smolt_age + Population + Sea_age * SG + SST_BarentsSeaE + SST_BarentsSeaW + log(Imm2y) + (1   Smolt_year) + (1   Birth_year)                                                                                 | 17        | -1234.4        | 634.18        | -1268.4        |
|                     | <b>TotSG ~ 1 + FWG * Smolt_age + Population + Sea_age * SG + SST_BarentsSeaE + SST_BarentsSeaW + log(Imm2y) + (1   Smolt_year) + (1   Birth_year)</b>                                                                          | <b>17</b> | <b>-1233.4</b> | <b>633.71</b> | <b>-1267.4</b> |

**Table S2.** Summary of Linear mixed-effects models for Freshwater growth of 1SW and 2SW fish, and sea growth of 1SW fish.

| <i>Predictors</i>              | Total growth in the freshwater (FWG) |               |                  | 1SW sea growth (SG) |               |                  |
|--------------------------------|--------------------------------------|---------------|------------------|---------------------|---------------|------------------|
|                                | <i>Estimates</i>                     | <i>CI</i>     | <i>p</i>         | <i>Estimates</i>    | <i>CI</i>     | <i>p</i>         |
| (Intercept)                    | 0.54                                 | 0.50 – 0.58   | <b>&lt;0.001</b> | -1.45               | -2.47 – -0.42 | <b>0.006</b>     |
| Inari vs. Pulmanki population  | 0.05                                 | 0.05 – 0.05   | <b>&lt;0.001</b> | -0.78               | -0.82 – -0.75 | <b>&lt;0.001</b> |
| Inari vs. Utsjoki population   | 0.06                                 | 0.05 – 0.06   | <b>&lt;0.001</b> | -0.99               | -1.03 – -0.96 | <b>&lt;0.001</b> |
| 1SW vs. 2SW                    | -0.01                                | -0.02 – -0.01 | <b>&lt;0.001</b> |                     |               |                  |
| Smolt age, 3 vs. 4             | 0.09                                 | 0.09 – 0.10   | <b>&lt;0.001</b> | -0.03               | -0.06 – 0.01  | 0.191            |
| Smolt age, 3 vs. 5             | 0.14                                 | 0.14 – 0.15   | <b>&lt;0.001</b> | -0.14               | -0.18 – -0.10 | <b>&lt;0.001</b> |
| Mean temperature °C May        | -0.02                                | -0.04 – 0.00  | 0.133            |                     |               |                  |
| Mean temperature °C June       | 0.01                                 | -0.01 – 0.03  | 0.286            |                     |               |                  |
| Mean temperature °C July       | -0.02                                | -0.04 – -0.00 | <b>0.043</b>     |                     |               |                  |
| Mean temperature °C August     | -0.01                                | -0.04 – 0.01  | 0.213            |                     |               |                  |
| Mean temperature °C September  | -0.02                                | -0.05 – -0.00 | <b>0.045</b>     |                     |               |                  |
| River age [1] × RG             | 1.62                                 | 1.59 – 1.64   | <b>&lt;0.001</b> |                     |               |                  |
| River age [2] × RG             | 1.16                                 | 1.14 – 1.18   | <b>&lt;0.001</b> |                     |               |                  |
| River age [3] × RG             | 0.99                                 | 0.98 – 1.01   | <b>&lt;0.001</b> |                     |               |                  |
| River age [4] × RG             | 0.98                                 | 0.97 – 1.00   | <b>&lt;0.001</b> |                     |               |                  |
| River age [5] × RG             | 1.02                                 | 1.00 – 1.04   | <b>&lt;0.001</b> |                     |               |                  |
| FWG                            |                                      |               |                  | 0.16                | 0.13 – 0.20   | <b>&lt;0.001</b> |
| Annual mean SST, Barents Sea E |                                      |               |                  | 0.54                | 0.30 – 0.77   | <b>&lt;0.001</b> |
| FWG × Smolt age [4]            |                                      |               |                  | 0.01                | -0.03 – 0.04  | 0.772            |
| FWG × Smolt age [5]            |                                      |               |                  | -0.03               | -0.07 – 0.01  | 0.125            |
| <b>Random Effects</b>          |                                      |               |                  |                     |               |                  |
| $\sigma^2$                     |                                      | 0.01          |                  |                     | 0.57          |                  |
| $\tau_{00}$                    |                                      | 0.01          | Growth_year      |                     | 0.00          | Birth_year       |
|                                |                                      | 0.01          | Birth_year       |                     | 0.24          | Smolt_year       |
|                                |                                      | 0.00          | Smolt_year       |                     |               |                  |
| ICC                            |                                      | 0.59          |                  |                     | 0.30          |                  |
| N                              |                                      | 49            | Smolt_year       |                     | 45            | Smolt_year       |
|                                |                                      | 51            | Birth_year       |                     | 47            | Birth_year       |

53 Growth\_year

Observations

73889

15749

Marginal R<sup>2</sup> / Conditional R<sup>2</sup>

0.186 / 0.669

0.215 / 0.448

---

**Table S3.** Summary for LMM of 1SW fish sea growth with monthly means as covariates. SST refers sea surface temperature (°C).

| <i>Predictors</i>                                    | <b>1SW sea growth (SG)</b> |               |                  |
|------------------------------------------------------|----------------------------|---------------|------------------|
|                                                      | <i>Estimates</i>           | <i>CI</i>     | <i>p</i>         |
| (Intercept)                                          | -5.18                      | -6.60 – -3.76 | <b>&lt;0.001</b> |
| FWG                                                  | 0.17                       | 0.13 – 0.20   | <b>&lt;0.001</b> |
| Smolt age, 3 vs. 4                                   | -0.03                      | -0.07 – 0.01  | 0.152            |
| Smolt age, 3 vs. 5                                   | -0.14                      | -0.18 – -0.10 | <b>&lt;0.001</b> |
| Inari vs. Pulmanki population                        | -0.78                      | -0.82 – -0.75 | <b>&lt;0.001</b> |
| Inari vs. Utsjoki population                         | -0.99                      | -1.03 – -0.96 | <b>&lt;0.001</b> |
| Mean SST, June                                       | -0.06                      | -0.37 – 0.25  | 0.720            |
| Mean SST, July                                       | 0.06                       | -0.30 – 0.41  | 0.755            |
| Mean SST, Aug                                        | 0.33                       | -0.05 – 0.71  | 0.085            |
| Mean SST, Sep                                        | 0.44                       | 0.05 – 0.83   | <b>0.028</b>     |
| Mean SST, Oct                                        | 0.06                       | -0.34 – 0.46  | 0.776            |
| Mean SST, Nov                                        | -0.13                      | -0.48 – 0.21  | 0.450            |
| FWG × Smolt age [4]                                  | 0.01                       | -0.03 – 0.04  | 0.778            |
| FWG × Smolt age [5]                                  | -0.03                      | -0.07 – 0.01  | 0.129            |
| <b>Random Effects</b>                                |                            |               |                  |
| $\sigma^2$                                           |                            | 0.57          |                  |
| $\tau_{00}$ Birth_year                               |                            | 0.00          |                  |
| $\tau_{00}$ Smolt_year                               |                            | 0.10          |                  |
| ICC                                                  |                            | 0.15          |                  |
| N Smolt_year                                         |                            | 44            |                  |
| N Birth_year                                         |                            | 47            |                  |
| Observations                                         |                            | 15615         |                  |
| Marginal R <sup>2</sup> / Conditional R <sup>2</sup> |                            | 0.303 / 0.408 |                  |

**Table S4.** Summary of Linear mixed-effects model for sea growth of 2SW fish.

| <i>Predictors</i>                                    | <i>Estimates</i> | <b>Total SG</b> |                  |
|------------------------------------------------------|------------------|-----------------|------------------|
|                                                      |                  | <i>CI</i>       | <i>p</i>         |
| (Intercept)                                          | 1.26             | 1.07 – 1.44     | <b>&lt;0.001</b> |
| FWG (scale)                                          | 0.07             | 0.05 – 0.09     | <b>&lt;0.001</b> |
| Smolt age, 3 vs. 4                                   | -0.02            | -0.04 – -0.00   | <b>0.017</b>     |
| Smolt age, 3 vs. 5                                   | -0.04            | -0.07 – -0.02   | <b>&lt;0.001</b> |
| Inari vs. Pulmanki population                        | -0.23            | -0.25 – -0.21   | <b>&lt;0.001</b> |
| Inari vs. Utsjoki population                         | -0.19            | -0.21 – -0.18   | <b>&lt;0.001</b> |
| Sea year 1 vs. 2                                     | 0.22             | 0.15 – 0.30     | <b>&lt;0.001</b> |
| Annual SG                                            | 1.10             | 1.05 – 1.15     | <b>&lt;0.001</b> |
| Annual mean SST, Barents Sea E                       | -0.02            | -0.07 – 0.02    | 0.346            |
| Annual mean SST, Barents Sea W                       | 0.01             | -0.04 – 0.07    | 0.662            |
| log(BM2y)                                            | -0.01            | -0.02 – 0.01    | 0.435            |
| FWG × Smolt age [4]                                  | -0.03            | -0.05 – -0.01   | <b>0.002</b>     |
| FWG × Smolt age [5]                                  | -0.04            | -0.06 – -0.02   | <b>0.001</b>     |
| Sea year × SG                                        | -0.10            | -0.16 – -0.04   | <b>0.001</b>     |
| <b>Random Effects</b>                                |                  |                 |                  |
| $\sigma^2$                                           |                  | 0.04            |                  |
| $\tau_{00}$ Birth_year                               |                  | 0.00            |                  |
| $\tau_{00}$ Smolt_year                               |                  | 0.00            |                  |
| $N$ Smolt_year                                       |                  | 43              |                  |
| $N$ Birth_year                                       |                  | 44              |                  |
| Observations                                         |                  | 3765            |                  |
| Marginal R <sup>2</sup> / Conditional R <sup>2</sup> |                  | 0.691 / NA      |                  |
